# Supplementary material
Source: Research Square preprint supplement (doi:10.21203/rs.3.rs-9481849/v1)
Supplement: Supplementary file 1 [file 86f991a32750c24043d5bc60.docx]

**Supplementary Information**

**Appendix A. Questionnaire Items**

Table A. Research construct notation and indicator

| Construct | Notation | Indicator |
| --- | --- | --- |
| Performance Expectancy (PE) | PE1 | GenAI helps me complete academic tasks or work more quickly and efficiently |
| PE2 | The quality of my academic work improves when I use GenAI |
| Effort Expectancy (EE) | EE1 | I can learn how to use GenAI without experiencing significant difficulty |
| EE2 | The interface and operating procedures of GenAI are easy for me to understand |
| EE3 | Using GenAI does not require much effort from me |
| Social Influence (SI) | SI1 | My lecturers or peers encourage me to use GenAI |
| SI2 | Recommendations from people around me make me more inclined to use GenAI |
| SI3 | I use GenAI because its use has become common in my academic environment |
| Facilitating Conditions (FC) | FC1 | I have adequate devices and internet access to use GenAI |
| FC2 | My institution provides support to facilitate the use of GenAI (e.g., guidelines, FAQs) |
| Hedonic Motivation (HM) | HM1 | I enjoy my academic activities more when using GenAI |
| HM2 | I feel enthusiastic about trying GenAI features in my academic activities |
| Habit (HB) | HB1 | I use GenAI almost every time I work on academic tasks |
| HB2 | During academic activities, I automatically consider using GenAI |
| HB3 | Using GenAI has become part of my study or work routine |
| Behavioral Intention (BI) | BI1 | I plan to continue using GenAI in my academic activities in the future |
| BI2 | I intend to increase the frequency of my GenAI use |
| BI3 | I will recommend the use of GenAI to friends or colleagues |
| Use Behavior (UB) | UB1 | The frequency with which I use GenAI to understand academic materials or concepts |
| UB2 | The frequency with which I use GenAI to draft or edit academic assignments or texts |
| UB3 | The frequency with which I use GenAI for research, idea formulation, and reference searching |
| Policy Clarity (PC) | PC1 | The guidelines or policies regarding GenAI use in my environment are easy to understand |
| PC2 | These guideline provide clear examples of ethical GenAI use |
|  | PC3 | I understand how to apply these guidelines in my academic activities |
| PC4 | The dissemination of AI-related guidelines in my environment is conducted clearly and openly |
| Integrity Culture (IC) | IC1 | Academic honesty is considered very important in my environment |
| IC2 | Lecturers and students at my institution model ethical academic behavior |
| IC3 | Ethical violations (including the misuse of AI) in my environment are treated seriously and not tolerated |
| Integrity Safe-Use (ISU) | ISU1 | When using GenAI for academic activities, I review and edit its outputs before using them |
| ISU2 | I do not use GenAI to copy text or engage in academic misconduct |
| ISU3 | I take responsibility for content I produce with the assistance of GenAI |
| Disclosure (DC) | DC1 | I openly state when I use GenAI in assignments, research, or work |
| DC2 | I inform lecturers or peers about the role of GenAI when discussing my work |
